## Retraction: The crucial role of SRPK1 in IGF-1-induced EMT of human gastric cancer

Hong Wang<sup>1</sup>, Chunlei Wang<sup>2</sup>, Wenling Tian<sup>1</sup> and Yanfen Yao<sup>3</sup>

<sup>1</sup>Department of General Surgery, Shandong Provincial Third Hospital, Jinan, Shandong, China

<sup>2</sup>Thyroid Disease Prevention and Control Center, Shandong Provincial Institute of Endemic Disease Control, Jinan, Shandong, China

<sup>3</sup>Department of Intensive Care Unit, Shandong Provincial Third Hospital, Jinan, Shandong, China

**Published:** August 14, 2024

**Copyright:** © 2024 Wang et al. This is an open access article distributed under the terms of the [Creative Commons Attribution License](#) (CC BY 4.0), which permits unrestricted use, distribution, and reproduction in any medium, provided the original author and source are credited.

**This article has been retracted:** Figure 1C, presenting IHC staining for SRPK1 in gastric cancer tissues, contains a duplicate image of Figure 1C illustrating IHC staining for neogenin-1 in adjacent normal tissues of gastric cancer, from a previously published paper [1]. Figure 7B, presenting images of wound healing assay in gastric cancer cells, also contains a duplicate image from Figure 3A in a second previously published paper [2], studying epithelial ovarian carcinoma. And images of transwell assay In Figure 7C, are duplicates of images from Figure 6B and 6D in a third earlier published paper describing hepatocellular carcinoma study [3]. In light of these facts, the Editorial decision has been made to retract this paper. All authors agreed with the decision.

Original article: Oncotarget. 2017; 8:72157–72166. <https://doi.org/10.18632/oncotarget.20048>

### REFERENCES

1. Kim SJ, Wang YG, Lee HW, Kang HG, La SH, Choi IJ, Irimura T, Ro JY, Bresalier RS, Chun KH. Up-regulation of neogenin-1 increases cell proliferation and motility in gastric cancer. *Oncotarget*. 2014; 5:3386–98. <https://doi.org/10.18632/oncotarget.1960>. [PubMed]
2. Cheng S, Guo J, Yang Q, Han L. Crk-like adapter protein is required for TGF- $\beta$ -induced AKT and ERK-signaling pathway in epithelial ovarian carcinomas. *Tumour Biol*. 2015; 36:915–19. <https://doi.org/10.1007/s13277-014-2724-0>. [PubMed]
3. Sui C, Zhuang C, Sun D, Yang L, Zhang L, Song L. Notch1 regulates the JNK signaling pathway and increases apoptosis in hepatocellular carcinoma. *Oncotarget*. 2017; 8:45837–47. <https://doi.org/10.18632/oncotarget.17434>. [PubMed]
